# Supplementary material
Source: PubMed Central journal article supplement (PMC8119076)
Supplement: 07-0422.pdf [file 07-0422.pdf]

**On-line Table: Characteristics of 13 patients with endovascular treated vertebral or basilar dissection aneurysms**

| Patient No./<br>Age/Gender | Clinical Presentation,<br>Hunt & Hess Grade | Timing of Treatment<br>after SAH (days) | Location of Dissection         | Vertebral Artery<br>Dominance                  | Therapy                                                                            | Imaging Follow-up                                                     | Outcome at 6<br>Months |
|----------------------------|---------------------------------------------|-----------------------------------------|--------------------------------|------------------------------------------------|------------------------------------------------------------------------------------|-----------------------------------------------------------------------|------------------------|
| 1/63/M                     | SAH, HH III                                 | 3                                       | Left V4 (AICA-PICA<br>complex) | L < R                                          | Internal coil trapping                                                             | 6 months, complete occlusion<br>on DSA                                | GOS 5                  |
| 2/52/F                     | SAH, HH I                                   | 0                                       | Left V4 (AICA-PICA<br>complex) | L = R                                          | Internal coil trapping                                                             | 6 months, complete occlusion<br>on DSA                                | GOS 5                  |
| 3/47/M                     | SAH, HH III                                 | 4                                       | Left V4, proximal to PICA      | L = R                                          | Internal coil trapping                                                             | 13 months, complete occlusion<br>on DSA                               | GOS 5                  |
| 4/64/F                     | SAH, HH IV                                  | 30                                      | Left V4 proximal to PICA       | L > R                                          | Internal coil trapping EVD                                                         | 6 months, complete occlusion<br>on DSA no infarction on MRI           | GOS 4                  |
| 5/51/M                     | SAH, HH I                                   | 30                                      | Right V4 over PICA             | R = L also dissection<br>left vertebral artery | Stent only                                                                         | 6 months, complete occlusion<br>on DSA PICA open                      | GOS 5                  |
| 6/49/F                     | SAH, HH I                                   | 5                                       | Left V4 over PICA              | L > R                                          | Internal coil trapping over<br>PICA                                                | 6 months, complete occlusion<br>on DSA no infarction on MRI           | GOS 5                  |
| 7/55/M                     | SAH, HH III                                 | 4                                       | Left V4 over PICA              | L = R                                          | Internal coil trapping over<br>PICA, balloon occlusion<br>V3                       | 6 months, complete occlusion<br>on DSA no infarction on MRI           | GOS 5                  |
| 8/10/M                     | Acute mass effect brain<br>stem             | -                                       | Right V4 distal to PICA        | R = L                                          | Internal coil trapping                                                             | 3 and 6 months, aneurysm<br>decreased in size on MRI                  | No symptoms            |
| 9/36/F                     | SAH, HH IV                                  | 1                                       | Left V4 distal to PICA         | L > > R                                        | Internal coil trapping<br>after balloon test<br>occlusion left vertebral<br>artery | 3 and 6 months, no infarction<br>on CT                                | GOS 5                  |
| 10/53/M                    | SAH, HH II                                  | 14                                      | Left V4 distal to PICA         | L > > R                                        | Internal coil trapping<br>after test occlusion left<br>vertebral artery            | 12 months, complete occlusion<br>on MRA                               | GOS 5                  |
| 11/49/F                    | SAH, HH IV                                  | 1                                       | Left V4 distal to PICA         | L = R                                          | Internal coil trapping                                                             | 6 months, no infarction on MRI                                        | GOS 4                  |
| 12/48/F                    | SAH, HH IV                                  | 180                                     | Right V4 distal to PICA        | R = L                                          | Internal coil trapping                                                             | 6 and 30 months, complete<br>occlusion on MRA no<br>infarction on MRI | GOS 5                  |
| 13/56/M                    | SAH, HH V                                   | 1                                       | Left V4 distal to PICA         | L < R                                          | Internal coil trapping EVD                                                         | 7 months, no infarction on CT                                         | GOS 4                  |
| 14/40/F                    | SAH, HH IV                                  | 3                                       | Right V4 distal to PICA        | R =                                            | Internal coil trapping EVD                                                         | 6 months, complete occlusion<br>on DSA                                | GOS 5                  |

**Note:**—SAH indicates subarachnoid hemorrhage; HH, Hunt and Hess scale; V4, intradural segment vertebral artery; V3, extradural C1 loop of vertebral artery; AICA, anterior inferior cerebellar artery; PICA, posterior inferior cerebellar artery; EVD, external ventricular drainage; DSA, digital subtraction angiography; GOS, Glasgow Outcome Scale; MRI, MR imaging; MRA, MR angiography; > >, much larger.
